# Supplementary material for: GCN5 Potentiates Glioma Proliferation and Invasion via STAT3 and AKT Signaling Pathways
Source: MDPI journal article supplement (doi:10.3390/ijms160921897), 2015-09-10
Supplement: s1 [file s1]

# Supplementary Information

**Table S1.** Characteristics of Glioma patients

| Patient Number | Age | Sex    | WHO Classification | Pathological Diagnosis |
|----------------|-----|--------|--------------------|------------------------|
| 1              | 41  | Male   | II                 | Oligodendrocyte        |
| 2              | 51  | Female | IV                 | Glioblastoma           |
| 3              | 43  | Male   | II                 | Astroglioma            |
| 4              | 38  | Male   | IV                 | Glioblastoma           |
| 5              | 45  | Female | II                 | Astroglioma            |
| 6              | 75  | Female | III                | Anaplastic astrocytoma |
| 7              | 14  | Female | IV                 | Glioblastoma           |
| 8              | 39  | Male   | I                  | Pilocytic astrocytoma  |
| 9              | 44  | Male   | IV                 | Glioblastoma           |
| 10             | 52  | Female | II                 | Oligodendrocyte        |
| 11             | 45  | Female | IV                 | Glioblastoma           |
| 12             | 55  | Male   | I                  | Pilocytic astrocytoma  |
| 13             | 58  | Female | IV                 | Glioblastoma           |
| 14             | 53  | Male   | II                 | Astroglioma            |
| 15             | 52  | Male   | III                | Anaplastic astrocytoma |

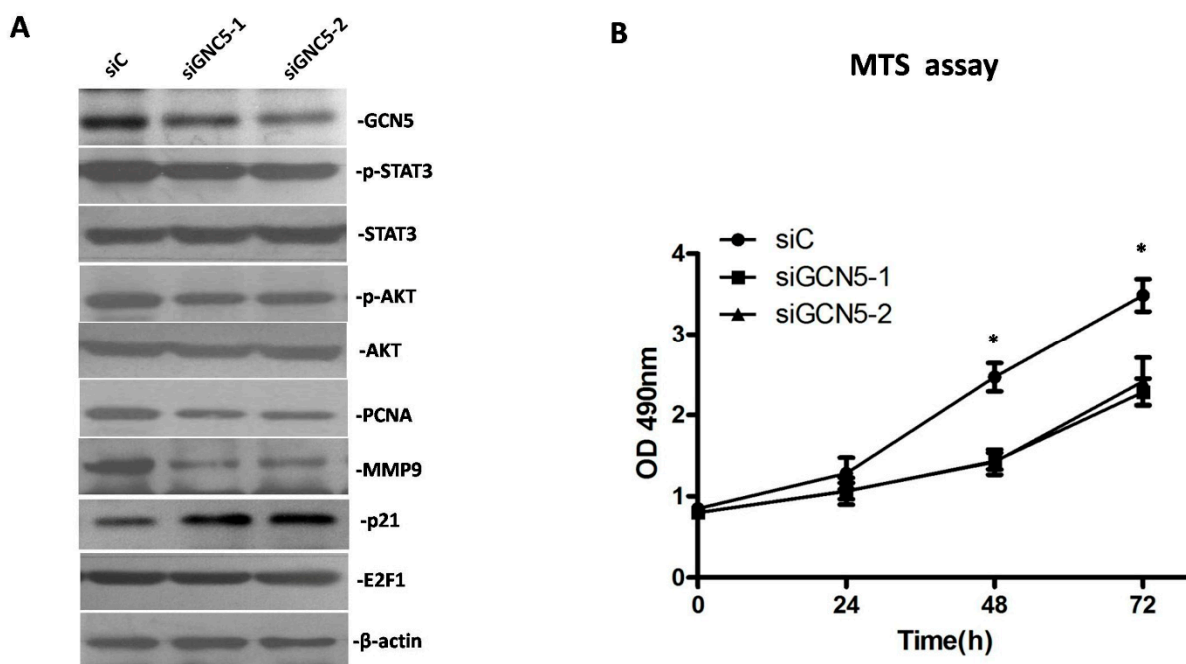

**Figure S1.** (A) GCN5 knockdown decreased the expression of p-STAT3, p-AKT, PCNA, MMP9 and increased the expression of p21 in CHG5 cell; and (B) MTS assay indicated that GCN5 knockdown suppressed cell growth rate in CHG5 cell (\*  $p < 0.05$ ).
